# Supplementary material for: Myo-Inositol Supplementation in Suckling Rats Protects against Adverse Programming Outcomes on Hypothalamic Structure Caused by Mild Gestational Calorie Restriction, Partially Comparable to Leptin Effects
Source: MDPI journal article supplement (doi:10.3390/nu13093257), 2021-09-18
Supplement: s1 [file s1]

## Supplementary Materials

Table S1. Nucleotide sequences of primers used for PCR amplification

| Gene           | Forward primer (5' to 3') | Reverse primer (5' to 3') | Amplicon size (pb) |
|----------------|---------------------------|---------------------------|--------------------|
| <i>β-actin</i> | GAAGCTGTGCTATGTTGCCC      | GGATTCCATACCCAGGAAGG      | 184                |
| <i>Gdil</i>    | CCGCACAAGGCAAATACATC      | GACTCTCTGAACCGTCATCAA     | 210                |
| <i>Lepr</i>    | AGCCAAACAAAAGCACCATT      | TCCTGAGCCATCCAGTCTCT      | 174                |
| <i>Socs3</i>   | ACTGAGCCGACCTCTCTCCT      | CCCCTCTGACCCTTTCTTTG      | 172                |
| <i>Insr</i>    | GTCCGGCGTTCATCAGAG        | CTCCTGGGATTCATGCTGTT      | 242                |
| <i>Npy</i>     | TGGACTGACCCTCGCTCTAT      | GTGTCTCAGGGCTGGATCTC      | 188                |
| <i>Agrp</i>    | AGAGTTCTCAGGTCTAAGTCT     | CTTGAAGAAGCGGCAGTAGCACGT  | 210                |
| <i>Bdnf</i>    | ATTAGCGAGTGGGTCACAGC      | CGAGTTCCAGTGCCTTTTGT      | 189                |
| <i>Pomc</i>    | CCTGTGAAGGTGTACCCCAATGTC  | CACGTTCTTGATGATGGCGTTC    | 266                |
| <i>Cart</i>    | AGAAGAAGTACGGCCAAGTCC     | CACACAGCTTCCCGATCC        | 84                 |
| <i>Mc4r</i>    | TATGGTACTGGAGCGCGTAA      | TCAGACGGAGGATGCTATGA      | 370                |
| <i>Lrp11</i>   | ACAGACGACCACGCCATT        | CCTGGGAAGCACAGTCACA       | 198                |
| <i>Gls</i>     | GGAGGGAAGGTTGCTGATTA      | AGGACTGAAGACAAAAGGGAAC    | 133                |
| <i>Ucp2</i>    | GGTCGGAGATACCAGAGCAC      | ATGAGGTTGGCTTTCAGGAG      | 173                |
| <i>Npc1</i>    | GCCGATTACCACACGCACTT      | AACACAAGCCACACGGGAACAG    | 122                |

Table S2. Daily amounts of supplemented leptin and myo-inositol from day 1 to day 20 of lactation

| Day of lactation | Leptin (ng) <sup>1</sup> | Myo-inositol (mg) <sup>2</sup> |
|------------------|--------------------------|--------------------------------|
| 1                | 1.0                      | 0.43                           |
| 2                | 2.0                      | 0.85                           |
| 3                | 3.0                      | 1.28                           |
| 4                | 4.0                      | 1.70                           |
| 5                | 5.0                      | 2.13                           |
| 6                | 6.3                      | 2.67                           |
| 7                | 7.5                      | 3.20                           |
| 8                | 8.8                      | 3.73                           |
| 9                | 10.0                     | 4.26                           |
| 19               | 11.3                     | 4.80                           |
| 11               | 15.6                     | 5.33                           |
| 12               | 17.2                     | 5.86                           |
| 13               | 18.8                     | 6.39                           |
| 14               | 20.3                     | 6.93                           |
| 15               | 21.9                     | 7.46                           |
| 16               | 23.5                     | 7.99                           |
| 17               | 25.0                     | 8.52                           |
| 18               | 26.6                     | 9.06                           |
| 19               | 39.4                     | 9.59                           |
| 20               | 43.8                     | 10.12                          |

<sup>1</sup> Picó, C.; Oliver, P.; Sánchez, J.; Miralles, O.; Caimari, A.; Priego, T.; Palou, A. The intake of physiological doses of leptin during lactation in rats prevents obesity in later life. *Int J Obes (Lond)*. **2007**, *31*(8), 1199-209.

<sup>2</sup> Castillo, P.; Palou, M.; Otero, D.; Núñez, P.; Palou, A.; Picó, C. Sex-specific Effects of Myo-inositol Ingested During Lactation in the Improvement of Metabolic Health in Adult Rats. *Mol Nutr Food Res*. **2021**, *65*(11), e2000965.

Figure S1. Percentage of NPY and  $\alpha$ MSH positive neurons in the arcuate nucleus of the hypothalamus

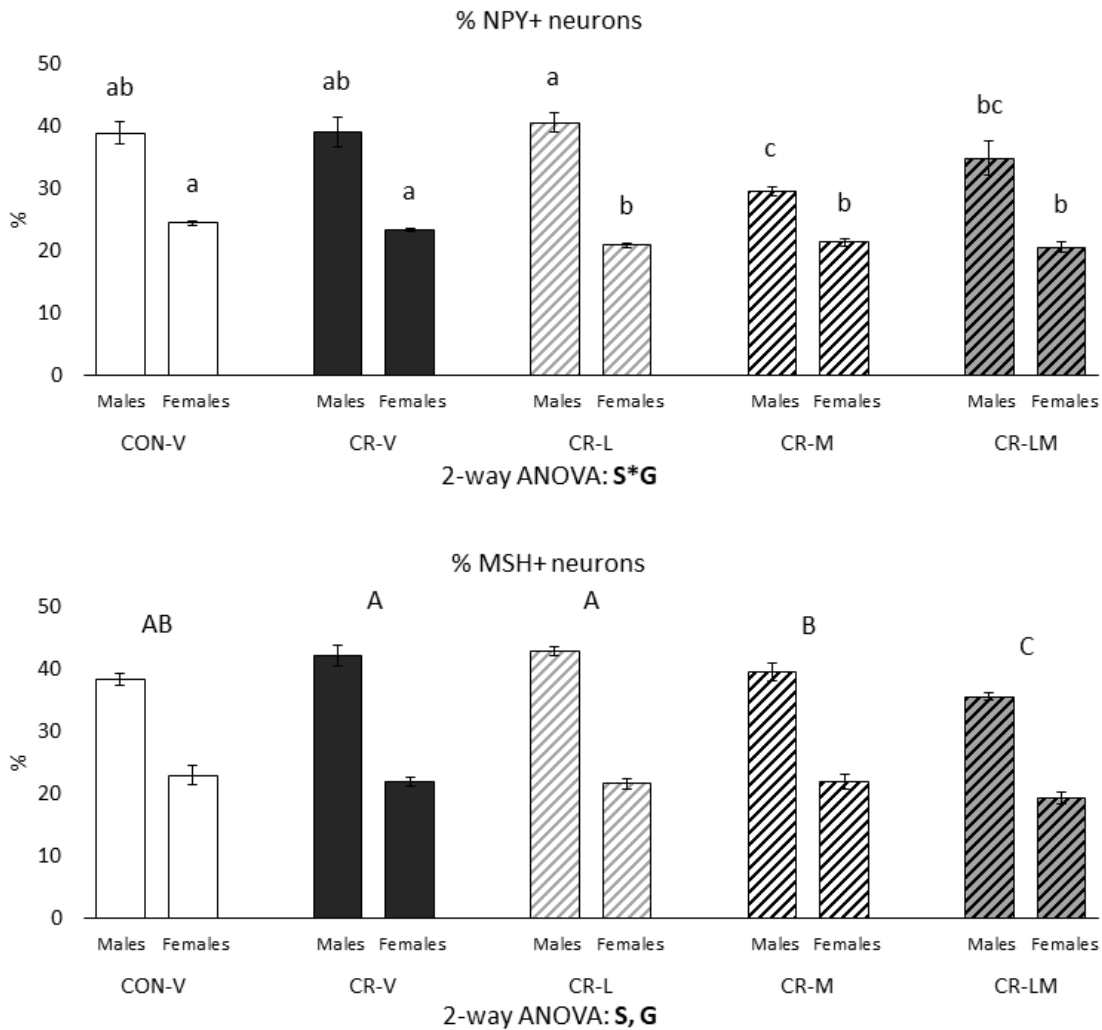

Percentage of NPY and  $\alpha$ MSH positive (NPY+ and  $\alpha$ MSH+) neurons in the arcuate nucleus of the hypothalamus of 25-day-old male and female offspring of control (CON) and 25% gestational calorie-restricted (CR) dams. Data are means  $\pm$  s.e.m (n=4-6). Statistics: Two-way ANOVA was performed to assess the effects of sex and group (CON-V, CR-V, CR-L, CR-M and CR-LM). One-way ANOVA was carried out to determine differences between groups in each sex separately, when previous two-way ANOVA showed interactive effect between sex and group. ANOVA was followed by a least significant difference (LSD) post-hoc test. Symbols: S, effect of sex; G, effect of group; S\*G, interactive effect between sex and group; A $\neq$ B $\neq$ C (P<0.05, two-way ANOVA); a $\neq$ b $\neq$ c (P<0.05, one-way ANOVA). Abbreviations: vehicle (V), leptin (L), myo-inositol (M), leptin and myo-inositol (LM).
